# Supplementary material for: Interleukin-8 and Interleukin-6 Are Biomarkers of Poor Prognosis in Esophageal Squamous Cell Carcinoma
Source: MDPI journal article supplement (doi:10.3390/cancers15071997), 2023-03-27

**Table S1** – Calculation of power and effect size for the realization of the Cox regression model.

| Variable of interest           | SD    | R2    | HR    | Power  |
|--------------------------------|-------|-------|-------|--------|
| <b>IL-12</b>                   | 0.461 | 0.190 | 0.326 | 0.94   |
| <b>TNF-<math>\alpha</math></b> | 0.468 | 0.051 | 0.226 | > 0.99 |
| <b>IL-8</b>                    | 0.468 | 0.218 | 4.564 | > 0.99 |

IL: Interleukin; TNF- $\alpha$ : Tumor necrosis factor  $\alpha$ ; SD: standard deviation of covariate of interest; R2: squared coefficient of multiple correlation with other covariates; HR: hazard ratio (exponentiated b1) associated in covariate of interest.

For this calculation, the software Stata v.14.0 was used under the powercox function.

**Table S2** - Pearson's correlation coefficient

| Covariable                     | r*     | p     |
|--------------------------------|--------|-------|
| <b>Race</b>                    | 0.073  | 0.635 |
| <b>IL-12</b>                   | 0.276  | 0.067 |
| <b>TNF-<math>\alpha</math></b> | -0.153 | 0.315 |
| <b>IL-8</b>                    | -0.01  | 0.95  |
| <b>Surgery</b>                 | -0.223 | 0.14  |
| <b>Radiotherapy</b>            | -0.175 | 0.251 |
| <b>Chemotherapy</b>            | 0.197  | 0.194 |
| <b>TNM</b>                     | -0.077 | 0.614 |

\* Pearson's correlation coefficient

**Table S3** – Characterization of the study population in relation to socio-demographic and lifestyle variables.

| Variable / Category                                      | Cases |      | Controls |      | P      |
|----------------------------------------------------------|-------|------|----------|------|--------|
|                                                          | n(*)  | (%)  | n (*)    | (%)  |        |
| <b>Sex</b>                                               |       |      |          |      |        |
| Male                                                     | 59    | 84.3 | 58       | 82.9 | 0.820  |
| Female                                                   | 11    | 15.7 | 12       | 17.1 |        |
| <b>Race</b>                                              |       |      |          |      |        |
| White                                                    | 50    | 73.5 | 51       | 72.9 | 0.929  |
| Non-white                                                | 18    | 26.5 | 19       | 27.1 |        |
| <b>Marital status</b>                                    |       |      |          |      |        |
| Not married                                              | 17    | 24.3 | 22       | 31.4 | 0.346  |
| Married                                                  | 53    | 75.7 | 48       | 68.6 |        |
| <b>Degree of education</b>                               |       |      |          |      |        |
| Illiterate / functional illiterate                       | 10    | 14.3 | 0        | 0.0  | <0.001 |
| Elementary and middle school                             | 56    | 80.0 | 54       | 77.1 |        |
| Higher education                                         | 4     | 5.7  | 16       | 22.9 |        |
| <b>Place residence</b>                                   |       |      |          |      |        |
| Urban area only                                          | 12    | 17.1 | 29       | 41.4 | 0.007  |
| Rural area only                                          | 8     | 11.4 | 5        | 7.1  |        |
| Both areas                                               | 50    | 71.4 | 36       | 51.4 |        |
| <b>Alcohol</b>                                           |       |      |          |      |        |
| Never                                                    | 3     | 4.3  | 12       | 17.1 | <0.001 |
| Yes, currently (if it was stopped in the last 12 months) | 36    | 51.4 | 49       | 70.0 |        |
| Yes, in the past                                         | 31    | 44.3 | 9        | 12.9 |        |
| <b>Tobacco</b>                                           |       |      |          |      |        |
| Never                                                    | 10    | 14.3 | 37       | 52.9 | <0.001 |
| Yes, currently (if it was stopped in the last 12 months) | 47    | 67.1 | 11       | 15.7 |        |
| Yes, in the past                                         | 13    | 18.6 | 22       | 31.4 |        |
| <b>Exposure to pesticide or insecticide</b>              |       |      |          |      |        |
| No                                                       | 28    | 40.0 | 50       | 73.5 | <0.001 |
| Yes                                                      | 42    | 60.0 | 18       | 26.5 |        |
| <b>Practice physical activity</b>                        |       |      |          |      |        |
| No                                                       | 49    | 70.0 | 36       | 51.4 | 0.024  |
| Yes                                                      | 21    | 30.0 | 34       | 48.6 |        |

Utilized test: Chi-square

Statistically significant if  $p < 0.05$

**Table S4 – Characterization of the case study group in relation to clinicopathological variables.**

| Variable                  | Category                  | n (*)     | (%)          |
|---------------------------|---------------------------|-----------|--------------|
| Topography of the tumor   | Upper third               | 2         | (3.7)        |
|                           | Middle third              | 31        | (57.4)       |
|                           | Lower third               | 2         | (3.4)        |
|                           | SOE                       | 19        | (35.2)       |
| Degree of differentiation | Well differentiated       | 9         | (13.8)       |
|                           | Moderately differentiated | 35        | (53.8)       |
|                           | Little differentiated     | 21        | 32.3)        |
| T                         | T1 – T2                   | 11        | (17.5)       |
|                           | T3 – T4                   | 52        | (85.5)       |
| N                         | N0                        | 19        | (34.5)       |
|                           | N positive                | 36        | (65.5)       |
| M                         | M0                        | 56        | (84.8)       |
|                           | M1                        | 10        | (15.2)       |
| TNM staging               | I – II                    | 17        | (28.8)       |
|                           | III – IV                  | 42        | (71.2)       |
| <b>Total</b>              |                           | <b>70</b> | <b>(100)</b> |

(\*)Cases with ignored values were excluded from the analysis.

SOE: Tumor located in more than one region of the oesophagus.

TNM staging: System based on the size and / or extent of the primary tumor (T), amount of compromised lymph nodes (N) and presence of metastases (M).

**Table S5 – Cutoff for cytokines.**

| Cytokines     | Cutoff | Sensitivity (%) | Specificity (%) | AUC (%) |
|---------------|--------|-----------------|-----------------|---------|
| IL-12p70      | 1.23   | 75.6            | 37.5            | 59.3    |
| TNF- $\alpha$ | 0.825  | 75.6            | 42.0            | 57.7    |
| IL-10         | 1.34   | 75.6            | 33.3            | 49.5    |
| IL-1 $\beta$  | 1.35   | 77.8            | 30.0            | 55.8    |
| IL-6          | 4.7    | 77.8            | 71.0            | 76.0    |
| IL-8          | 6.75   | 73.3            | 71.0            | 76.0    |

AUC: Area under the curve ROC; IL: Interleukin; TNF- $\alpha$ : Tumor necrosis factor  $\alpha$ .

Utilized test: ROC curve to find a cutoff point of cytokine levels and then dichotomize at low and high levels.

**Table S6** – Descriptive of the categorized cytokines.

| Cytokines                      | Categories (level)         | n (%)     |
|--------------------------------|----------------------------|-----------|
| <b>IL-12p70</b>                | Low (<1.23pg/mL)           | 49 (70.0) |
|                                | High ( $\geq$ 1.23 pg/mL)  | 21 (30.0) |
| <b>TNF-<math>\alpha</math></b> | Low (< 0.825 pg/mL)        | 48 (68.6) |
|                                | High ( $\geq$ 0.825 pg/mL) | 22 (31.4) |
| <b>IL-10</b>                   | Low (< 1.34 pg/mL)         | 50 (71.4) |
|                                | High ( $\geq$ 1.34 pg/mL)  | 20 (28.6) |
| <b>IL-1<math>\beta</math></b>  | Low (< 1.35 pg/mL)         | 52 (74.3) |
|                                | High ( $\geq$ 1.35 pg/mL)  | 18 (25.7) |
| <b>IL-6</b>                    | Low (< 4.7 pg/mL)          | 27 (38.6) |
|                                | High ( $\geq$ 4.7 pg/mL)   | 43 (61.4) |
| <b>IL-8</b>                    | Low (< 6.75 pg/mL)         | 29 (41.4) |
|                                | High ( $\geq$ 6.75 pg/mL)  | 41 (58.6) |

n: number; IL: Interleukin; TNF- $\alpha$ : Tumor necrosis factor  $\alpha$ ; pg/mL: picogram per millilitre.

**Table S7** - Relative expression of mRNA in tumor tissues induced by Kyse-30 and Kyse-410 cell lines.

| Gene  | Kyse-30 tumors         | Kyse-410 tumors         | p value       |
|-------|------------------------|-------------------------|---------------|
| CXCL1 | 2163 $\pm$ 455.1 (n=9) | 4775 $\pm$ 1380 (n=6)   | <b>0.0253</b> |
| VEGF  | 62759 $\pm$ 7422 (n=5) | 36033 $\pm$ 1512 (n=3)  | 0.3938        |
| CCL2  | 1631 $\pm$ 247.1 (n=5) | 547.5 $\pm$ 64.52 (n=3) | 0.0794        |
| CXCL2 | Not detected           | Not detected            |               |

Quantitation of the mRNA levels of the genes by qPCR were calculated using the 2- $\Delta$ CT method.  $\Delta$ CT was calculated by subtracting the CT (control: ubiquitin) from the CT (target gene).

**Figure S1** – Flowchart of inclusion of patients in the study.

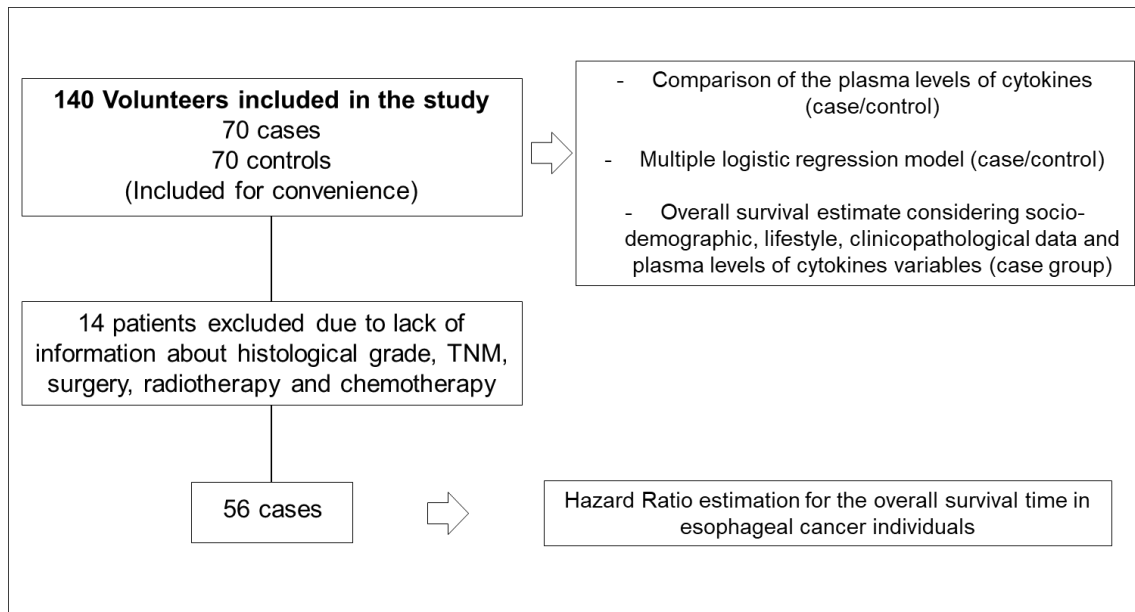

**Figure S2** - Kaplan-Meier curve of overall survival of individuals with esophageal cancer (n = 70).

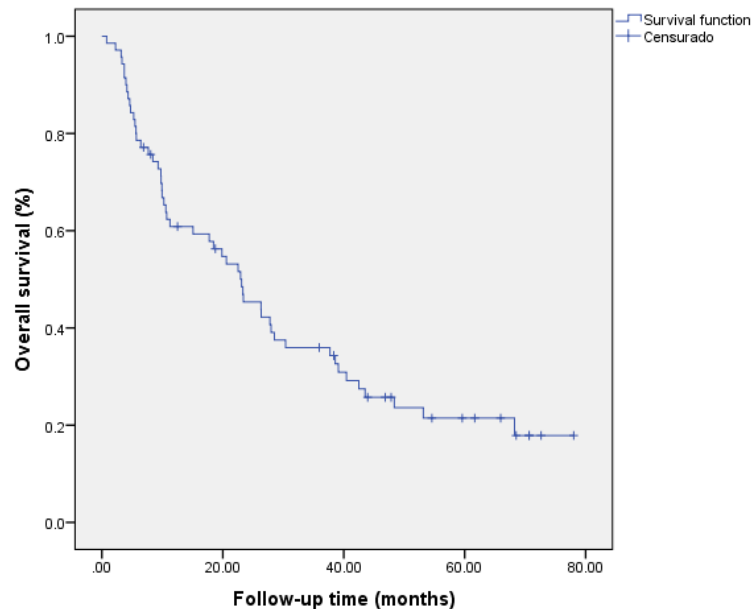

**Figure S3** - Kaplan-Meier curves of overall survival correlated with a) IL-6 (n = 70; 43 with high level and 27 with low level), b) IL-8 (n = 70; 41 with high level and 29 with low level), c) TNM (n = 59; 17 with TNM I / II and 42 with TNM III / IV) and d) Surgery (n = 64; 44 did not undergo surgery and 20 underwent surgery).

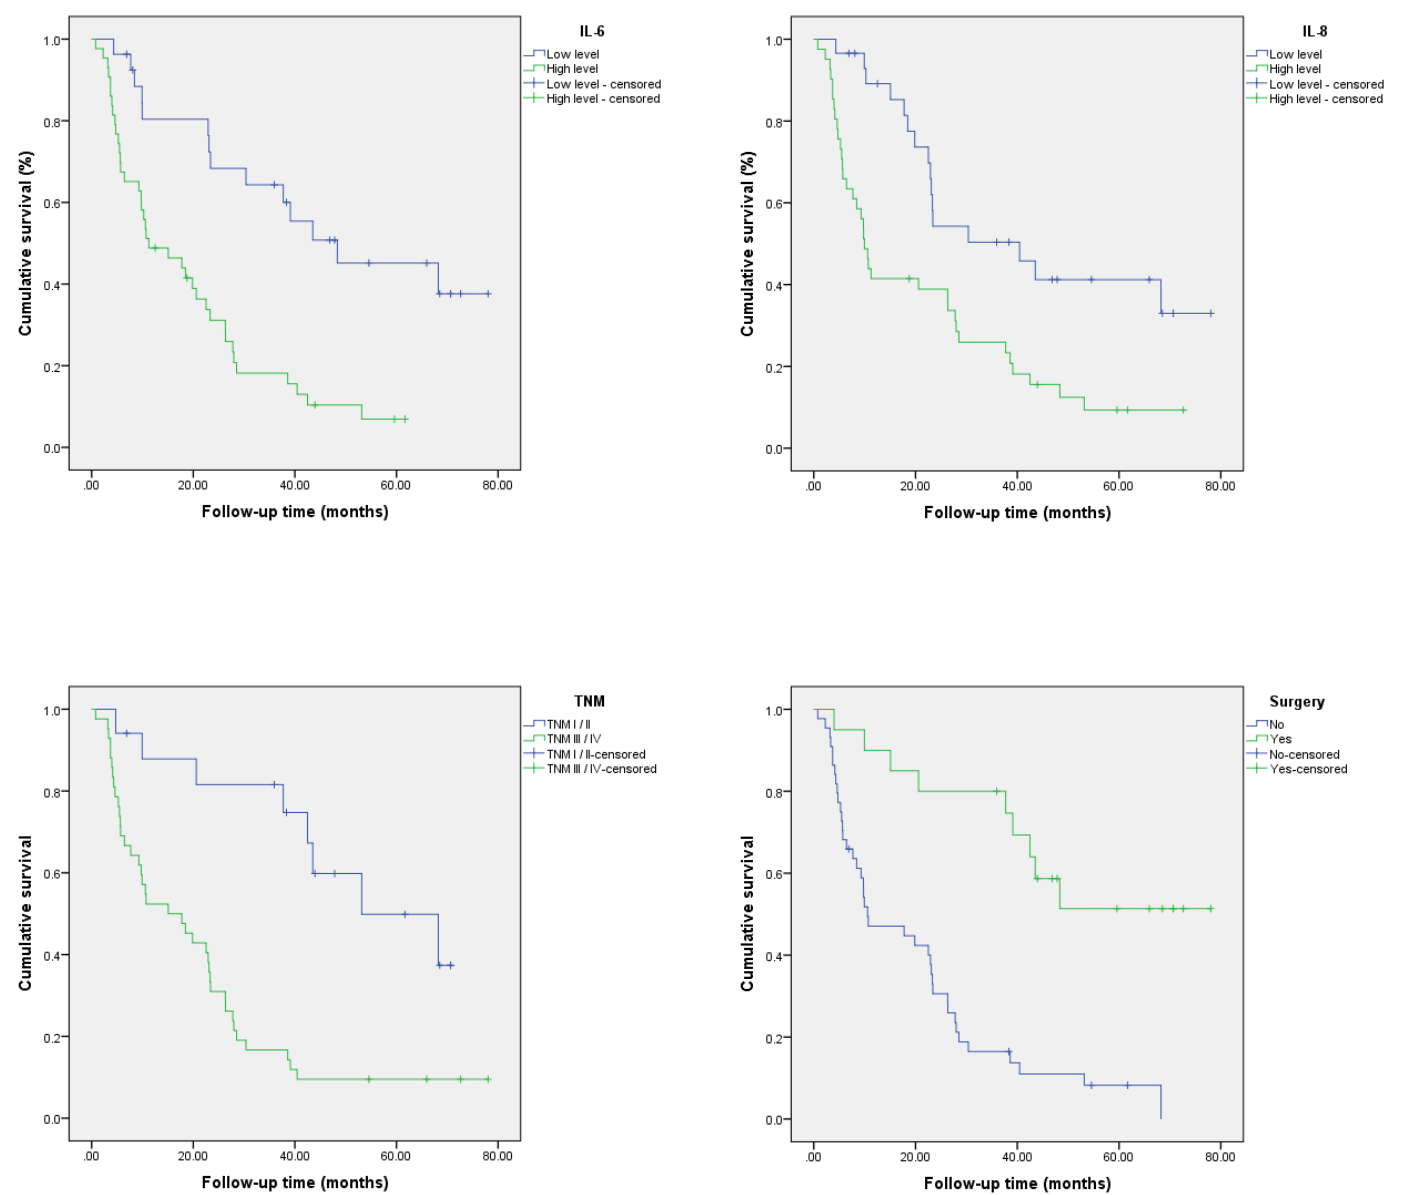

**Figure S4** – Gating strategy used for the analysis of intratumoral polymorphonuclear leukocytes (CD11b+ Ly6G+) in Kyse-30 or Kyse-410 tumor-bearing mice.

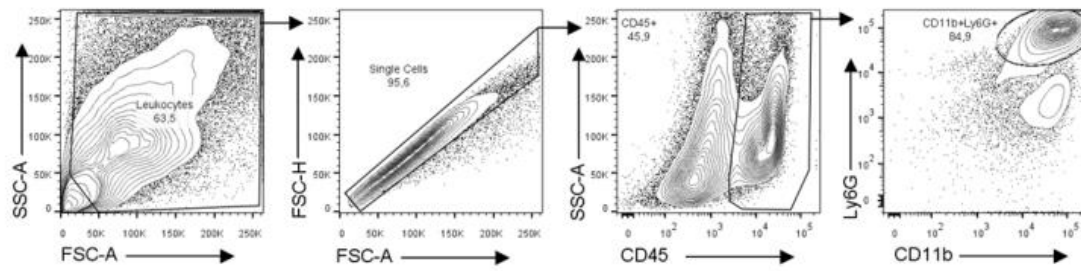

Supplement: s1 [file s1]
